# Supplementary material
Source: ML conference proceedings conference paper supplement (https://aclanthology.org/2026.semeval-1.162)

**2A Hybrid — Valence**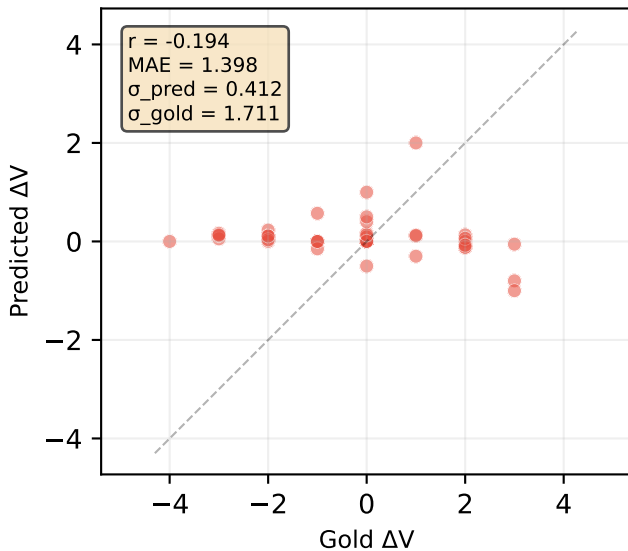**2A Hybrid — Arousal**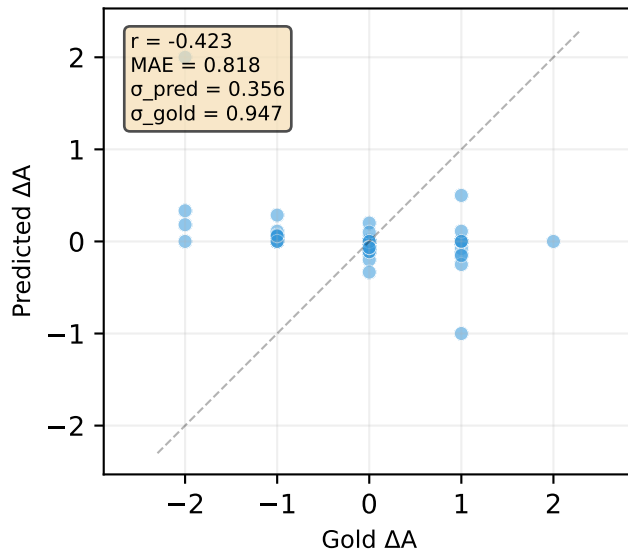**2B Heuristic — Valence**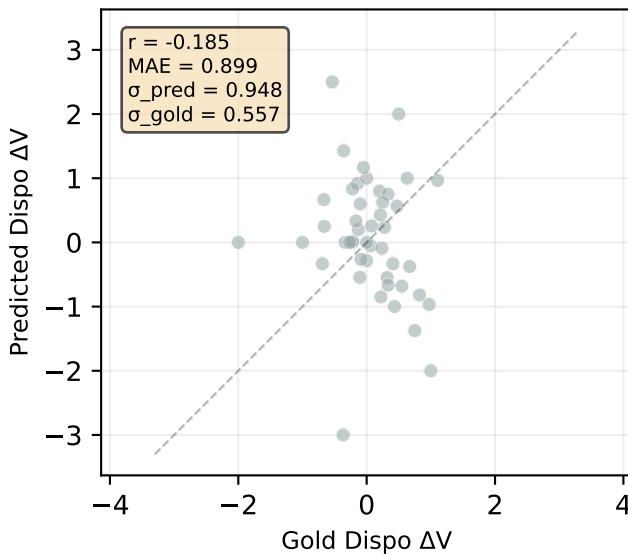**2B LLM v1 — Valence**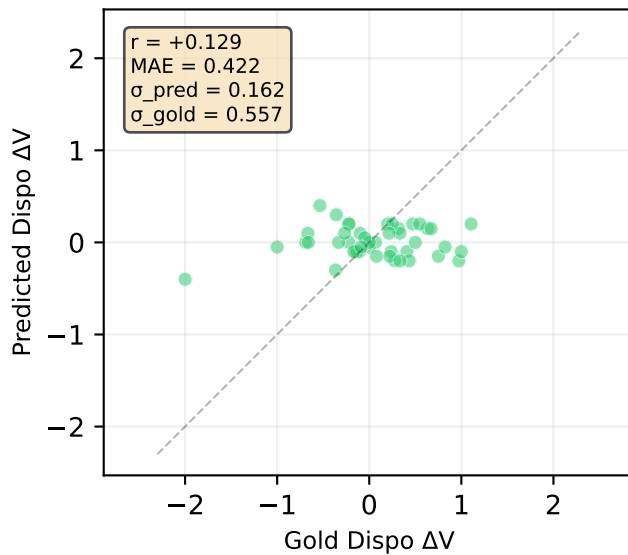

Supplement: SupplementaryMaterial [file fig_scatter.pdf › supplementary_material/figures/fig_scatter.pdf]

# Variance Collapse: Predicted vs Gold Standard Deviation (Valence)

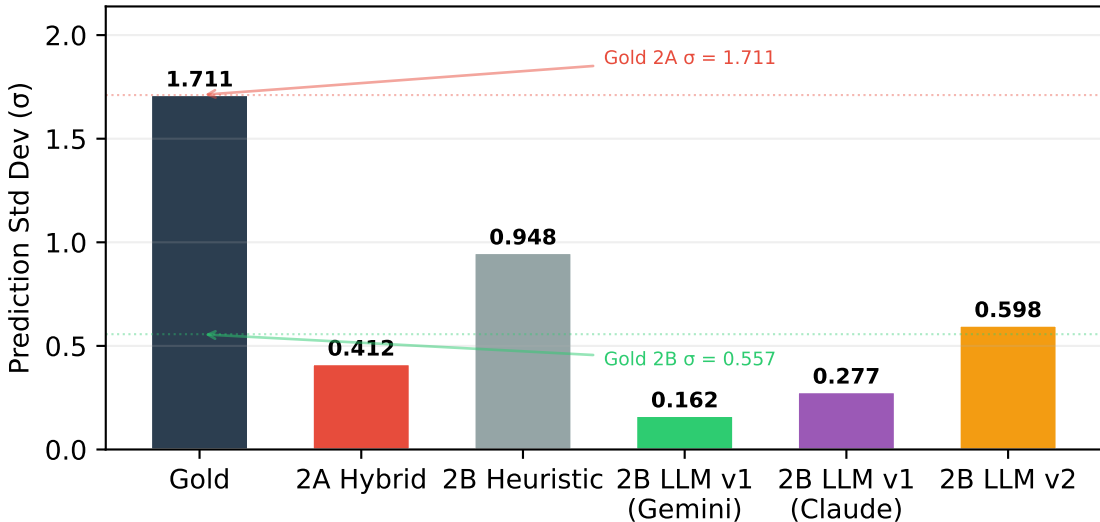

Supplement: SupplementaryMaterial [file fig_variance.pdf › supplementary_material/figures/fig_variance.pdf]
